# Supplementary material for: Nonlinear estimation for 60GHz millimeter-wave radar system based on Bayesian particle filtering
Source: Springer Nature journal article supplement (doi:10.1186/1687-1499-2013-33), 2013-02-19

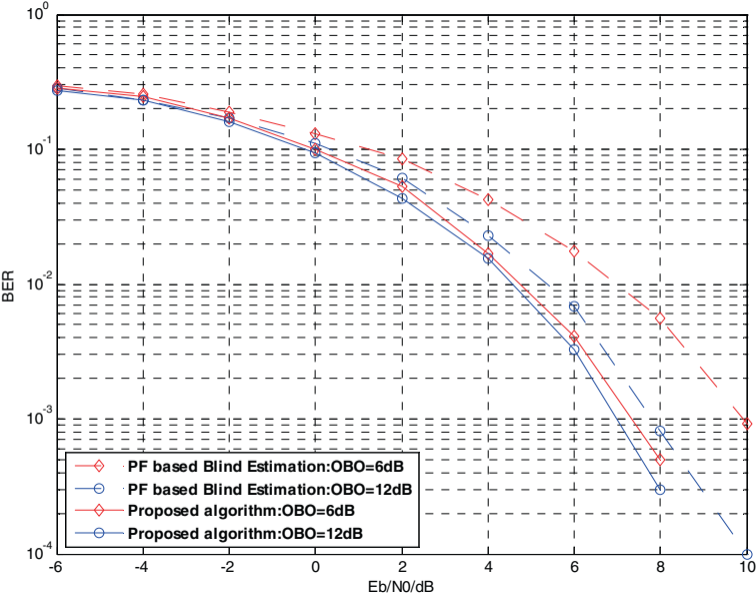

Supplement: 13638_2012_598_MOESM4_ESM.pdf [file 13638_2012_598_MOESM4_ESM.pdf]
